# Supplementary material for: Development of a Novel Gas-Sensing Platform Based on a Network of Metal Oxide Nanowire Junctions Formed on a Suspended Carbon Nanomesh Backbone
Source: MDPI journal article supplement (doi:10.3390/s21134525), 2021-07-01
Supplement: s1 [file s1]

## Supplementary Material

# Development of a Novel Gas-Sensing Platform Based on a Network of Metal Oxide Nanowire Junctions Formed on a Suspended Carbon Nanomesh Backbone

Taejung Kim <sup>1,†</sup>, Seungwook Lee <sup>1,†</sup>, Wootack Cho <sup>1</sup>, Yeong Min Kwon <sup>2</sup>, Jeong Min Baik <sup>3</sup> and Heungjoo Shin <sup>1,\*</sup>

<sup>1</sup> Department of Mechanical Engineering, Ulsan National Institute of Science and Technology (UNIST), Ulsan 44919, Korea; lgktj0305@unist.ac.kr (T.K.); zhffk9@unist.ac.kr (S.L.); dalgoo13418@unist.ac.kr (W.C.)

<sup>2</sup> Department of Materials Science and Engineering, Ulsan National Institute of Science and Technology (UNIST), Ulsan 44919, Korea; kwonym@unist.ac.kr

<sup>3</sup> School of Advanced Materials Science and Engineering, Sungkyunkwan University (SKKU), Suwon 16419, Korea; jbaik97@skku.edu

\* Correspondence: hjshin@unist.ac.kr; Tel.: +82-52-217-2315

† These authors contributed equally to this work.

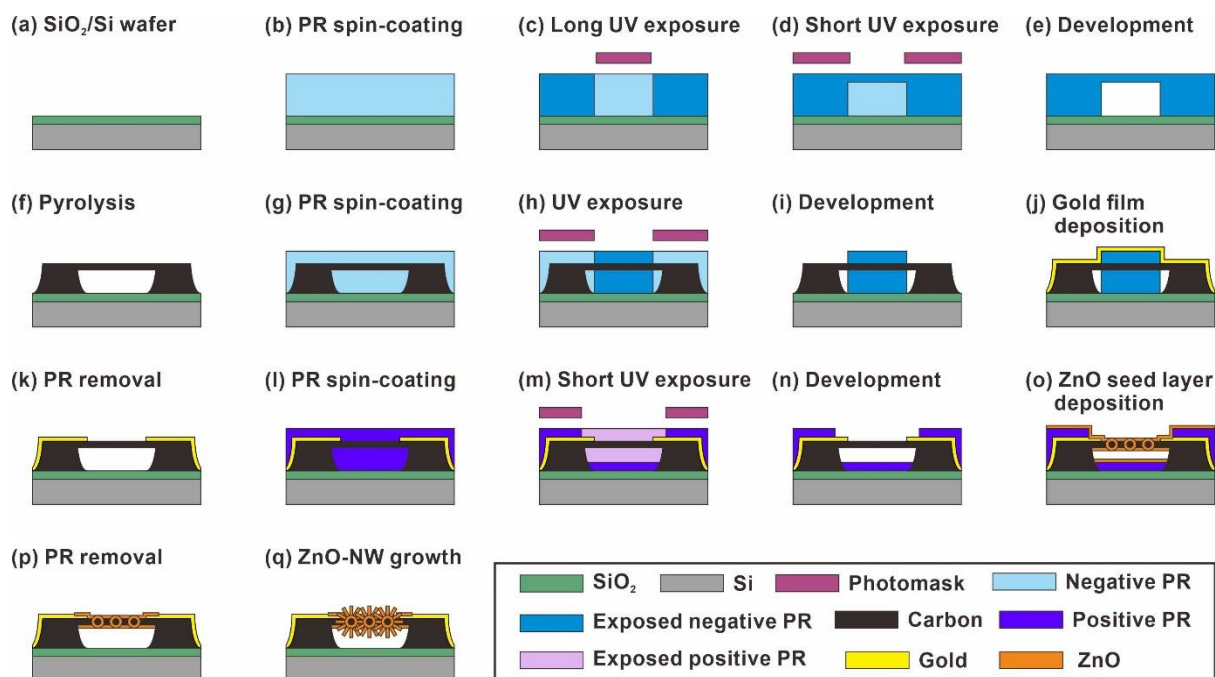

**Figure S1.** Schematic fabrication steps of suspended carbon nanomesh functionalized with ZnO NWs (PR: photoresist).

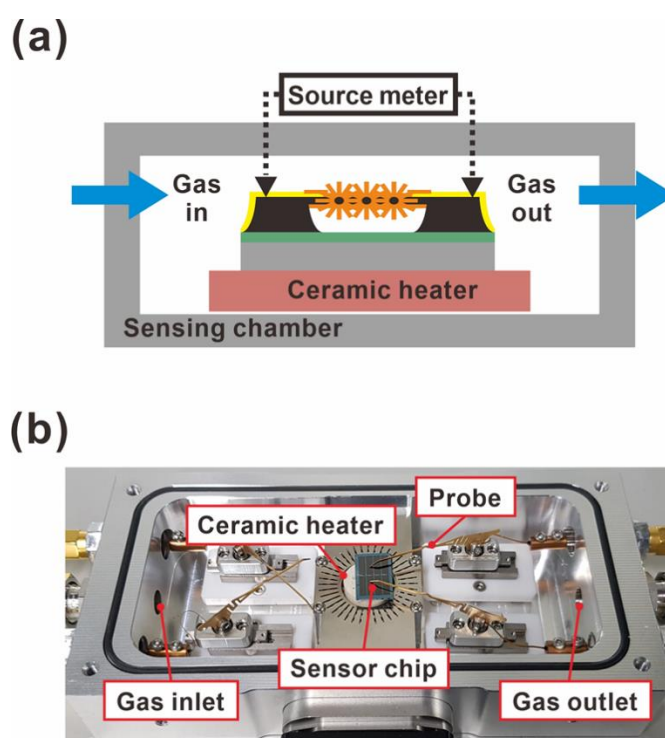

**Figure S2.** (a) Schematic of gas sensing experiment setup. (b) Photograph of the sensing chamber.

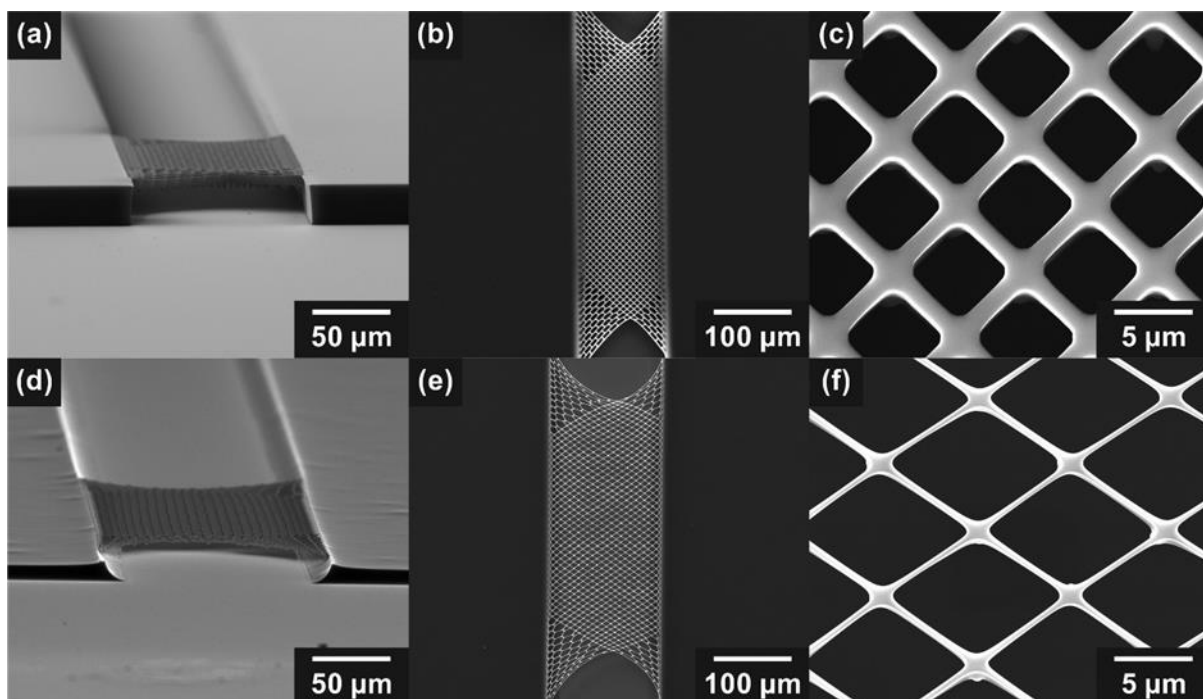

**Figure S3.** SEM images of (a-c) suspended polymer micromesh before pyrolysis and (d-f) corresponding suspended carbon nanomesh after pyrolysis: (a, d) Bird-eye view. (b, c, e, f) Top view.

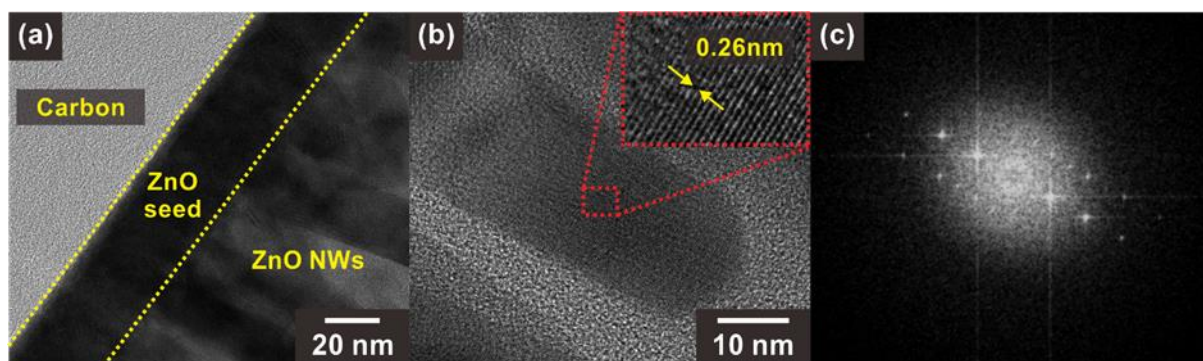

**Figure S4.** TEM analysis results of ZnO-NWs grown on a carbon pad: (a) TEM image of the overall sample structure, (b) HRTEM image, and (c) corresponding diffraction pattern.

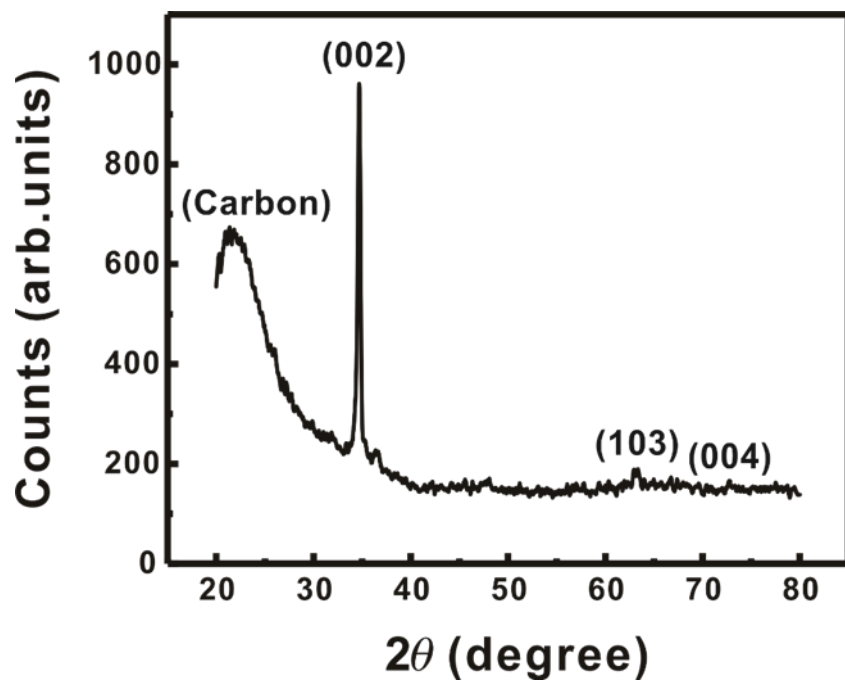

**Figure S5.** XRD pattern of ZnO NWs grown on a pyrolyzed carbon thin film in the quartz substrate.

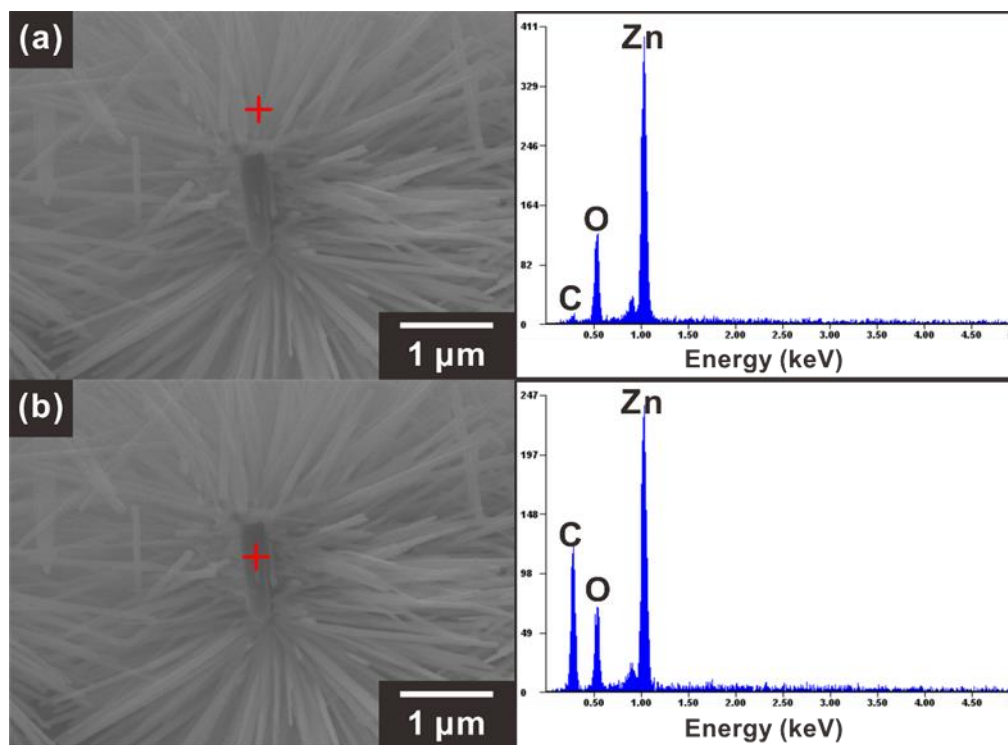

**Figure S6.** EDS analysis of the suspended carbon nanomesh functionalized with ZnO NWs: Point chemical analysis spectrum from (a) ZnO NWs and (b) carbon nanomesh.

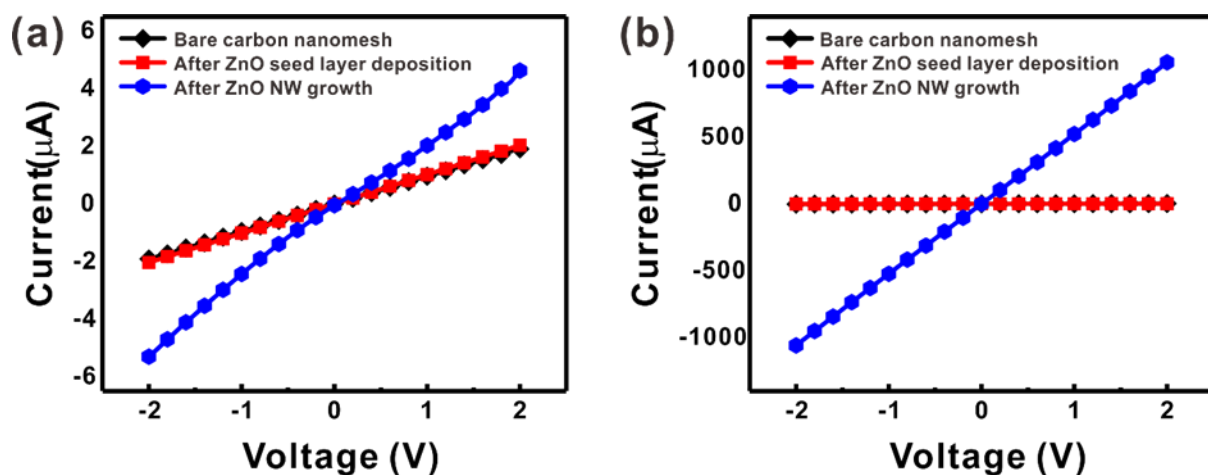

**Figure S7.** I-V curves of suspended nanomesh structures (black line: bare carbon nanomesh, red line: ZnO seed layer/carbon mesh, blue line: ZnO NWs/ZnO seed layer/carbon mesh) measured at (a) room temperature and (b) 250 °C.

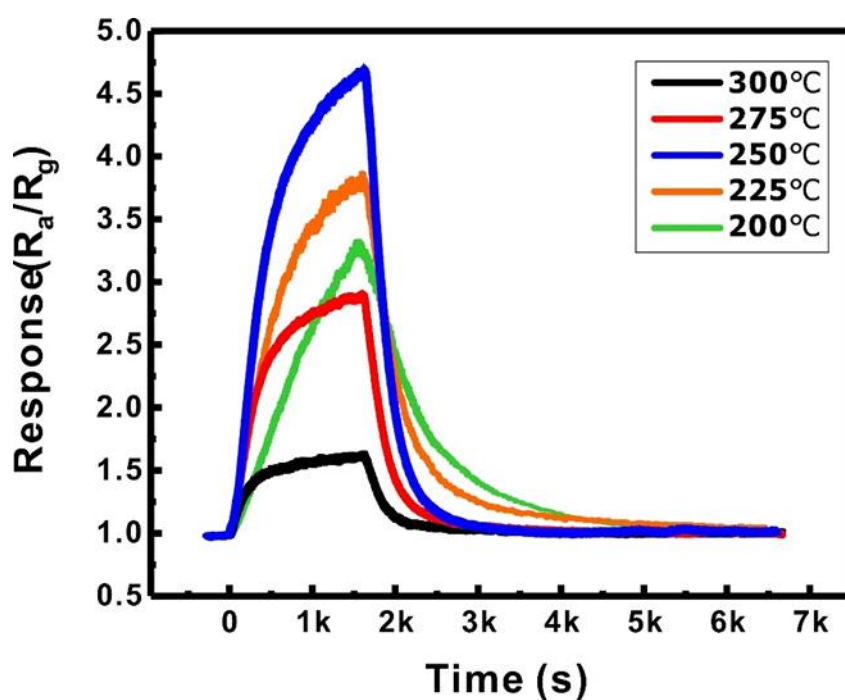

**Figure S8.** Gas sensing responses of a Type B sensor (ZnO NW junction networks grown on a suspended mesh with small voids) to 500 ppb NO<sub>2</sub> at various operating temperature conditions (200–300 °C).

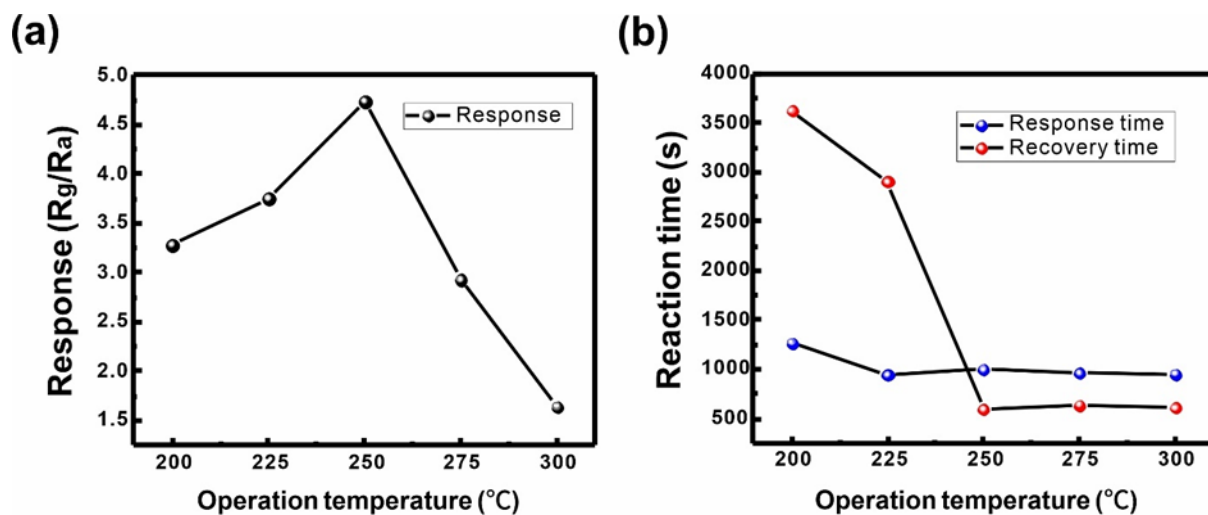

**Figure S9.** (a) Gas response and (b) response (blue)/recovery (red) time for various operating temperature conditions corresponding to the results shown in Figure S8.
